# Supplementary material
Source: PubMed Central journal article supplement (PMC3754718)

## Supplementary Information

### Table

Table S1 Assignment of T-RFs and analysis of the clone library of *pmoA* transcripts

| Phylogenetic lineage               | Number<br>of clone | Percentage<br>(%) | Related T-RFs<br>(bp)* |
|------------------------------------|--------------------|-------------------|------------------------|
| <i>Methylococcus/Methylocaldum</i> | 10                 | 18                | 75                     |
| <i>Methylomonas</i>                | 12                 | 22                | 438                    |
| <i>Methylobacter</i>               | 8                  | 15                | 508                    |
| <i>Methylocystis/Methylosinus</i>  | 25                 | 45                | 208, 244               |

\*: The sizes of the T-RFs relates to those determined in the T-RFLP analyses; they were sometimes slightly (1-4 bp) different from those determined *in silico* for the clone sequences.

## Figure Legends

Fig. S1 Phylogenetic tree of representative *pmoA* transcript clone sequences retrieved from the rhizosphere soil sample of FL treatment on Day 80.

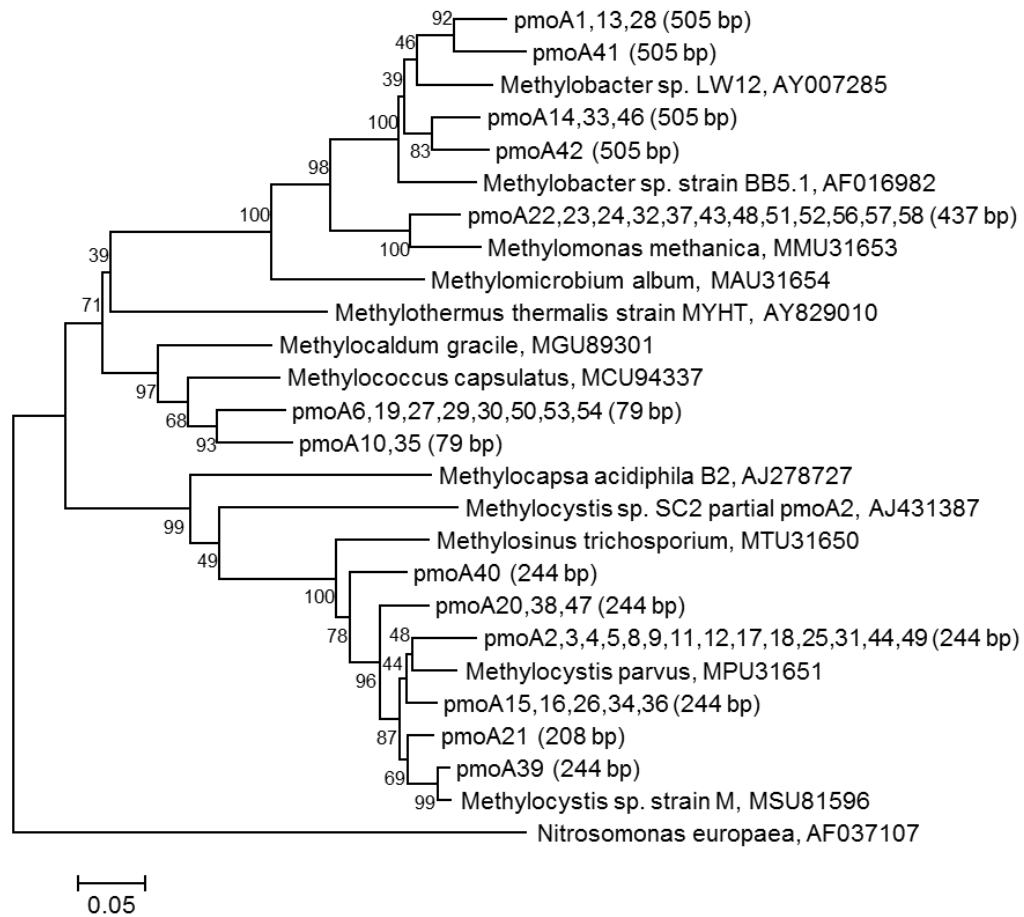

Fig. S2 Correspondence analyses of T-RFLP profiles generated for *pmoA* genes (A, DNA level) and *pmoA* transcripts (B, mRNA level). The eigenvalues of the first and second axes in the two-dimensional ordination diagrams are  $\lambda_1=0.689$ ,  $\lambda_2=0.129$  (DNA), and  $\lambda_1=0.736$ ,  $\lambda_2=0.178$  (mRNA). Different colors denote different sampling dates. Triangle, circle and square indicate surface soil, bulk soil and rhizosphere soil, respectively. At *pmoA* transcripts level (B), the data assigned to the FL and DR treatments are separately circled with blue and red, respectively.

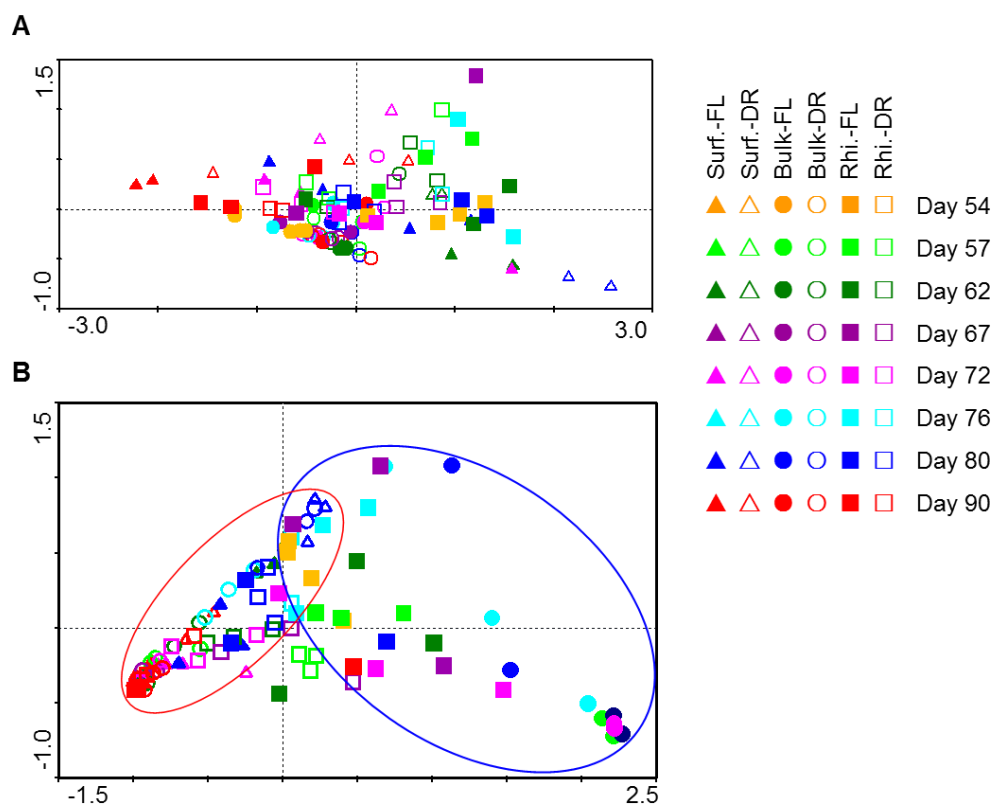

Supplement: AEM.00850-13_zam999104607so1.pdf [file AEM.00850-13_zam999104607so1.pdf]
